# Supplementary material
Source: PubMed Central journal article supplement (PMC9283713)
Supplement: NIHMS1669677-supplement-Materials_List.pdf [file NIHMS1669677-supplement-Materials_List.pdf]

Materials List for

# Sheath-Preserving Optic Nerve Transection in Rats to Assess Axon Regeneration and Interventions Targeting the Retinal Ganglion Cell Axon

Jiun L. Do<sup>1</sup>, Salam Allahwerdy<sup>1</sup>, Ryan C. David<sup>1</sup>, Robert N. Weinreb<sup>1</sup>, Derek S. Welsbie<sup>1</sup>

<sup>1</sup>Hamilton Glaucoma Center, Viterbi Family Department of Ophthalmology, Shiley Eye Institute, University of California San Diego

## Corresponding Author

Jiun L. Do  
jiundo@health.ucsd.edu

## Citation

Do, J.L., Allahwerdy, S., David, R.C., Weinreb, R.N., Welsbie, D.S. Sheath-Preserving Optic Nerve Transection in Rats to Assess Axon Regeneration and Interventions Targeting the Retinal Ganglion Cell Axon. *J. Vis. Exp.* (), e61748, doi:10.3791/61748 (2020).

## Date Published

September 6, 2020

## DOI

10.3791/61748

## URL

jove.com/video/61748

## Materials

| Name                                                                  | Company                     | Catalog Number           | Comments                                                                        |
|-----------------------------------------------------------------------|-----------------------------|--------------------------|---------------------------------------------------------------------------------|
| 4-0 Polyglactin suture                                                | Ethicon                     | J315H                    |                                                                                 |
| 9-0 Polypropylene suture                                              | Ethicon                     | 1754G                    |                                                                                 |
| Acepromazine                                                          | Butler                      | 003845                   | 0.5-4 mg/kg<br>Stock Concentration: 10 mg/mL<br>Final Concentration: 0.25 mg/mL |
| Ampicillin                                                            | Sandoz                      | 0781-3404-85             | 80-100 mg/kg<br>Final Concentration: 50 mg/mL                                   |
| Anesthesia System                                                     | VetEquip                    | 901806                   |                                                                                 |
| Animal incubator                                                      | Precision Incubators        | Chick Chalet II          |                                                                                 |
| Banamine                                                              | Schering-Plough             | 0061-0851-03             | 2.5-5 mg/kg<br>Stock Concentration: 50 mg/mL<br>Final Concentration: 0.5 mg/mL  |
| Borosilicate glass capillaries                                        | World Precision Instruments | 1B150F-4                 |                                                                                 |
| Colibri forceps                                                       | Katena                      | K5-1500                  |                                                                                 |
| Dumont #5/45 forceps                                                  | Fine Science Tools          | 11251-35                 |                                                                                 |
| Heat therapy pump                                                     | Kent Scientific             | HTP-1500                 |                                                                                 |
| Isoflurane                                                            | Covetrus                    | 29404                    |                                                                                 |
| Johns Hopkins Bulldog Clamp                                           | Roboz                       | RS-7440                  |                                                                                 |
| Ketamine                                                              | Putney                      | 26637-411-01             | 40-80 mg/kg<br>Stock Concentration: 100 mg/mL<br>Final Concentration: 25 mg/mL  |
| Microinjection system (Picospritzer II)                               | General Valve, Inc          |                          |                                                                                 |
| Microliter syringe 5 µL                                               | Hamilton                    | 88000                    |                                                                                 |
| Micropipette puller                                                   | Sutter Instrument Co.       | Model P-77 Brown-Flaming |                                                                                 |
| Neomycin/Polymyxin B sulfates/<br>Bacitracin Zinc Ophthalmic Ointment | Bausch + Lomb               |                          |                                                                                 |
| PBS                                                                   | Millipore                   | BSS-1005-B               |                                                                                 |
| Povidone-iodine                                                       | Healthpets                  | BET16OZ                  |                                                                                 |

|                                 |                    |             |                                                                                 |
|---------------------------------|--------------------|-------------|---------------------------------------------------------------------------------|
| Proparacaine hydrochloride 0.5% | Bausch + Lomb      |             |                                                                                 |
| Ringers                         | Abbott             | 04860-04-10 | 2-3 mL/injection                                                                |
| Stereotaxic Frame               | Kopf               |             |                                                                                 |
| Surgical Microscope             | Zeiss              |             |                                                                                 |
| Vannas scissors                 | Fine Science Tools | 91500-09    |                                                                                 |
| Xylazine                        | Lloyd              | 0410        | 2.5-8 mg/kg<br>Stock Concentration: 100 mg/mL<br>Final Concentration: 5.8 mg/mL |
